# Supplementary material for: Neutron imaging of an operational dilution refrigerator
Source: Springer Nature journal article supplement (doi:10.1038/s41598-022-05025-0), 2022-01-21
Supplement: 41598_2022_5025_MOESM1_ESM.pdf [file 41598_2022_5025_MOESM1_ESM.pdf]

## Supplementary materials

Supplementary Video S1 (S1.mp4) is a video of the condensation process (50 MB, 86 s). The displayed parameters T<sub>JT</sub>, T<sub>still</sub> and T<sub>MC</sub> are the temperatures of the Joule-Thompson mixture precooling stage, still and mixing chamber, respectively. The pressures P<sub>cond</sub>, P<sub>dump</sub> and P<sub>still</sub> are for the mixture condenser, storage tank and still. The time is shown at the bottom left in the format HH:MM:SS.

Supplementary Video S2 (S2.mp4) is a video of the single-shot process (2.9 MB, 47 s). The displayed parameters T<sub>MC</sub> and Mix <sup>3</sup>He are the mixing chamber temperature and <sup>3</sup>He concentration, respectively. The time is also shown in the format HH:MM:SS.
